# Supplementary material
Source: PubMed Central journal article supplement (PMC2217639)
Supplement: plntcell_tpc.107.054759_1.pdf [file plntcell_tpc.107.054759_1.pdf]

A

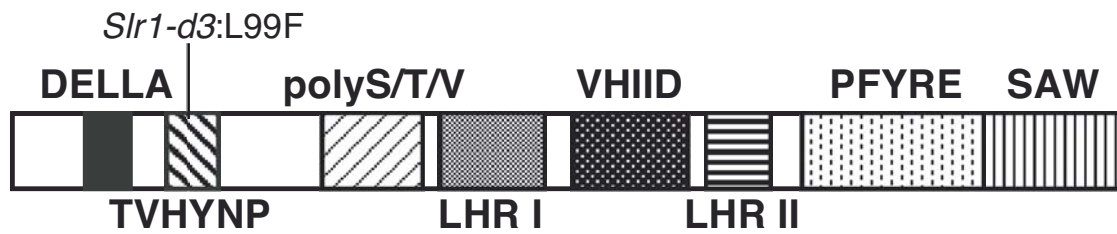

B

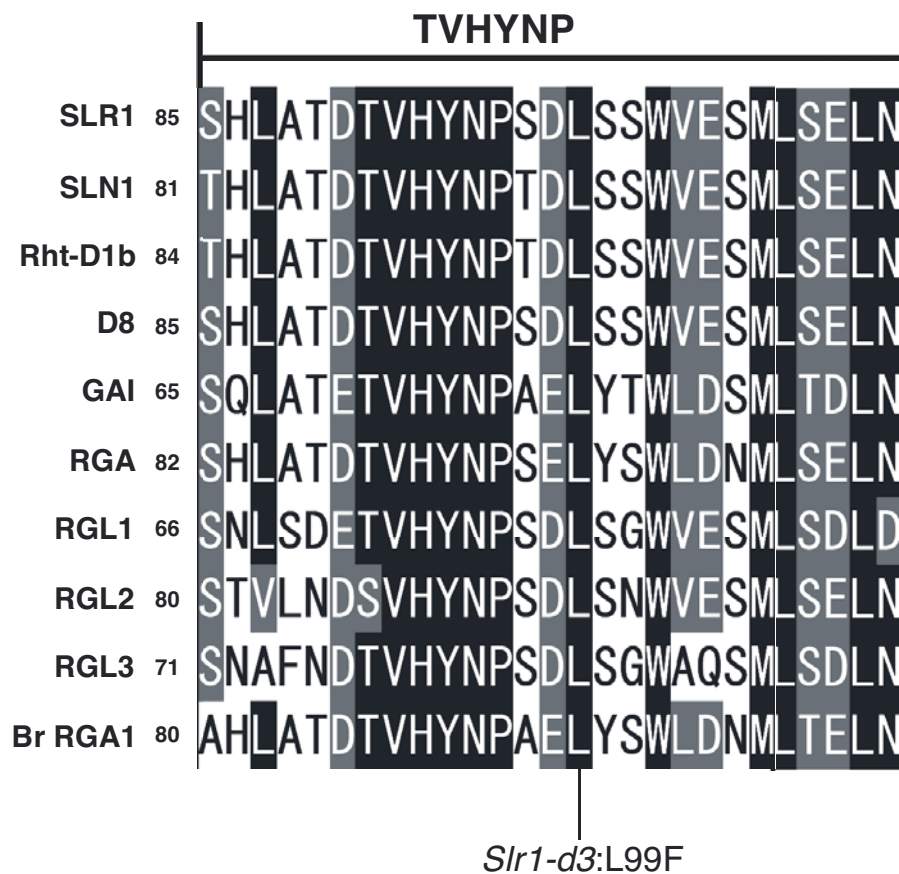

**Supplemental Figure 2. (A)** Diagram of the structure of the DELLA proteins and the mutation site of *Slr1-d3*. Individual domains are each shaded differently, including the DELLA, TVHYNP, Ser/Thr/Val-rich (polyS/T/V), LHR I and II (leucine repeat), VHIID, PFYRE motif, and SAW motif domains. **(B)** Alignment of SLR1 and other DELLA proteins at the TVHYNP domain.

Supplemental Table 1. List of primer sequences.

| Gene name     | Annealing temperature | Primer name              | Sequence (5'-3')                                       | Used for                    |
|---------------|-----------------------|--------------------------|--------------------------------------------------------|-----------------------------|
| <i>CPS1</i>   | 55°C                  | CPS1-U<br>CPS1-L         | ACGAATTGAGGAGGCAGCATCTATG<br>GAGCAAGTTCTTGCATACCCAACTC | Real-time PCR               |
| <i>KS1</i>    | 55°C                  | KS1-RTU1<br>KS1-RTL1     | CGTGGCGGTCACAAGAGATG<br>AGTTCTATCTCCCGGAGGTG           | Real-time PCR               |
| <i>KO2</i>    | 55°C                  | KO2-RTU2<br>KO2-RTL1     | GGCGAGCGCGCACGCAGCGT<br>AAGAAGCCCCGGTTCTTATA           | Real-time PCR               |
| <i>KAO</i>    | 55°C                  | KAO-RTU3<br>KAO-RTL2     | TTCTCCTGGGTTACAAGCTG<br>TTCCAGCTAAAGAATCCCTG           | Real-time PCR               |
| <i>GID1</i>   | 55°C                  | GID1-RTU<br>GID1-RTL2    | TGCCCTCCGGGAGATCTTGC<br>CGAGGTCCCGCTCGAACGTC           | Real-time PCR               |
| <i>SLR1</i>   | 55°C                  | SLR1-RTU1<br>SLR1-RTL2   | ACGGCTACCGGGTGGAGGAG<br>GAGCGTTCGTTGACGTCAAG           | Real-time PCR               |
| <i>GID2</i>   | 60°C                  | GID2-2U<br>GID2-2L       | AGGTTTCAGCTCTCGCTGTCA<br>TTGGAGTGAAGCTTATTCCA          | Real-time PCR               |
| <i>GAMYB</i>  | 55°C                  | GAMYB-3<br>GAMYB-4       | GAATCCACCCCTCCTGTT<br>GCCCCATTACTTGCTCTCC              | Real-time PCR               |
| <i>ACTIN1</i> | 62°C                  | ACT1-1<br>ACT1-2         | CATCTTGGCATCTCTCAGCAC<br>AACTTTGTCCACGCTAATGAA         | Real-time PCR               |
| <i>GID1</i>   | 60°C                  | GID1-26U<br>GID1-26L     | TAGTAGAGGGTCACTG<br>GGACACCACGACGCCCTTGCT              | genotyping of <i>gid1-3</i> |
| <i>CPS1</i>   | 60°C                  | CPS-TOS-1U<br>CPS-TOS-1L | TCCAATGCAGTGATGGATCC<br>TGGAAGTACCGCGATATCCC           | genotyping of <i>cps1-1</i> |
| <i>TOS17</i>  | 60°C                  | LTR4A                    | ACTGTATAGTTGGCCCATGTCCAG                               | genotyping of <i>cps1-1</i> |
| <i>KAO</i>    | 55°C                  | KAO-1U<br>KAO-1L         | TAGATCGTTCTCGATGGTG<br>ACAAGTCAGCATTGGTGTGG            | DNA sequence                |
| <i>KAO</i>    | 55°C                  | KAO-2U<br>KAO-2L         | AAATATTGAAACGGAGGG<br>CAGCACGGACACGAGCTTT              | DNA sequence                |
| <i>KAO</i>    | 55°C                  | KAO-3U<br>KAO-3L         | AACTACGGCATGCGCGCCATG<br>AAAAGTTCAGATGATTGAAACC        | DNA sequence                |
| <i>KAO</i>    | 55°C                  | KAO-4U<br>KAO-4L         | GTCACCTCACTCTGCTT<br>TTTGACAAATGAATTACGCG              | DNA sequence                |
| <i>KAO</i>    | 55°C                  | KAO-5U<br>KAO-5L         | ACTGCTCCAGCCGAATTACC<br>GTAGTAATCAGTCGATGTGG           | DNA sequence                |
| <i>KAO</i>    | 55°C                  | KAO-6U<br>KAO-6L         | GAATTCTGATTGATGTTGTTG<br>CATTGAAACACACTGAAAAAGGC       | DNA sequence                |
| <i>KAO</i>    | 55°C                  | KAO-7U<br>KAO-7L         | ATCAAAGTAGATTAAGCTCC<br>GAAAAGAAGAAGAGAGGTGCAGC        | DNA sequence                |
| <i>KAO</i>    | 55°C                  | KAO-8U<br>KAO-8L         | CATGTTTATTACTTGTCCC<br>CCCTGTTCAATTTATTTGTAC           | DNA sequence                |
